# Supplementary material for: The Epidemiology of Persons Living with Fontan in 2020 and Projections for 2030: Development of an Epidemiology Model Providing Multinational Estimates
Source: Springer Nature journal article supplement (doi:10.1007/s12325-021-02002-3), 2021-12-22
Supplement: MOESM1 [file 19973338]

**The epidemiology of persons living with Fontan in 2020 and projections for 2030:  
Development of an epidemiology model providing multinational estimates**

**Supplementary Material**

Leandra Plappert<sup>1</sup>, Susan Edwards<sup>2</sup>, Assunta Senatore<sup>2</sup>, Angela De Martini<sup>1</sup>

<sup>1</sup>*Charles River Associates, Zürich, Switzerland*

<sup>2</sup>*Actelion Pharmaceuticals Ltd., Allschwil, Switzerland*

**Corresponding author:** Susan Edwards,

Janssen Actelion Pharmaceuticals Ltd., Allschwil, Switzerland

[SEdwar10@ITS.JNJ.com](mailto:SEdwar10@ITS.JNJ.com)

**Figure S1: Overview of development of the epidemiologic model**

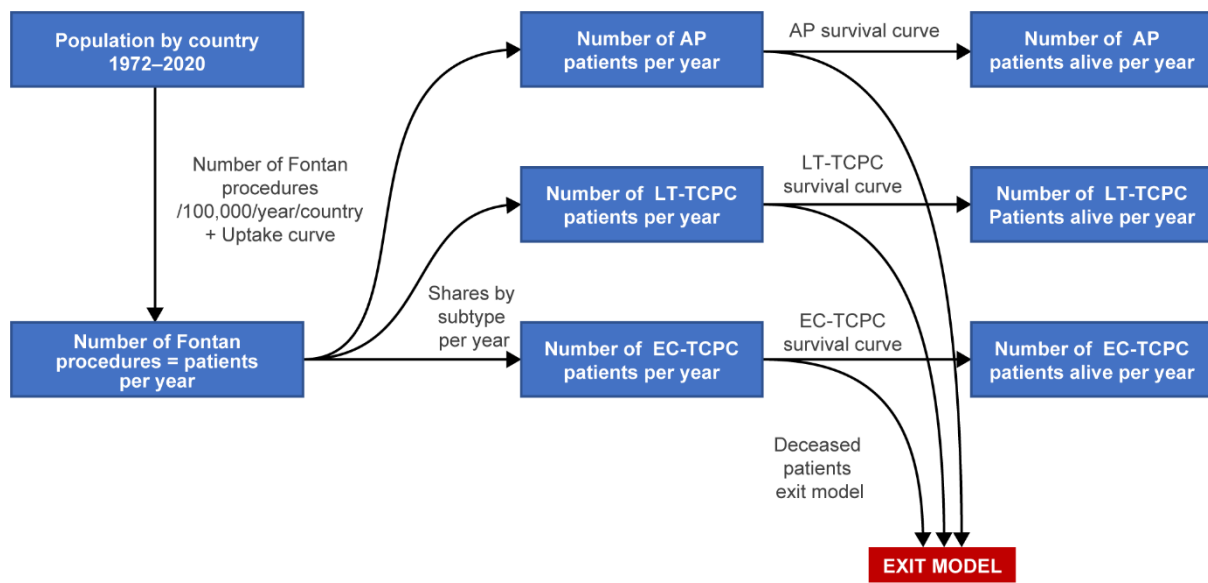

AP, atriopulmonary connection; EC-TCPC, extracardiac total cavopulmonary connection; LT-TCPC, lateral tunnel total cavopulmonary connection.

**Figure S2: Uptake curve applied to provide estimates for the number of Fontan procedures occurring prior to 2010**

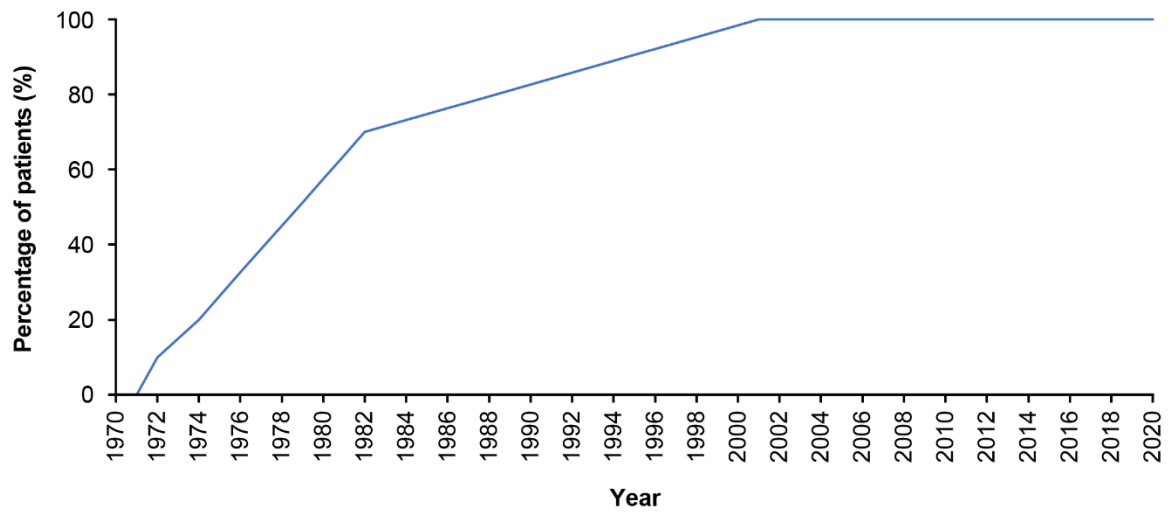

**Figure S3: Uptake curve used to model the number of Fontan procedures occurring, stratified by Fontan procedural subtype, for input into the epidemiology model**

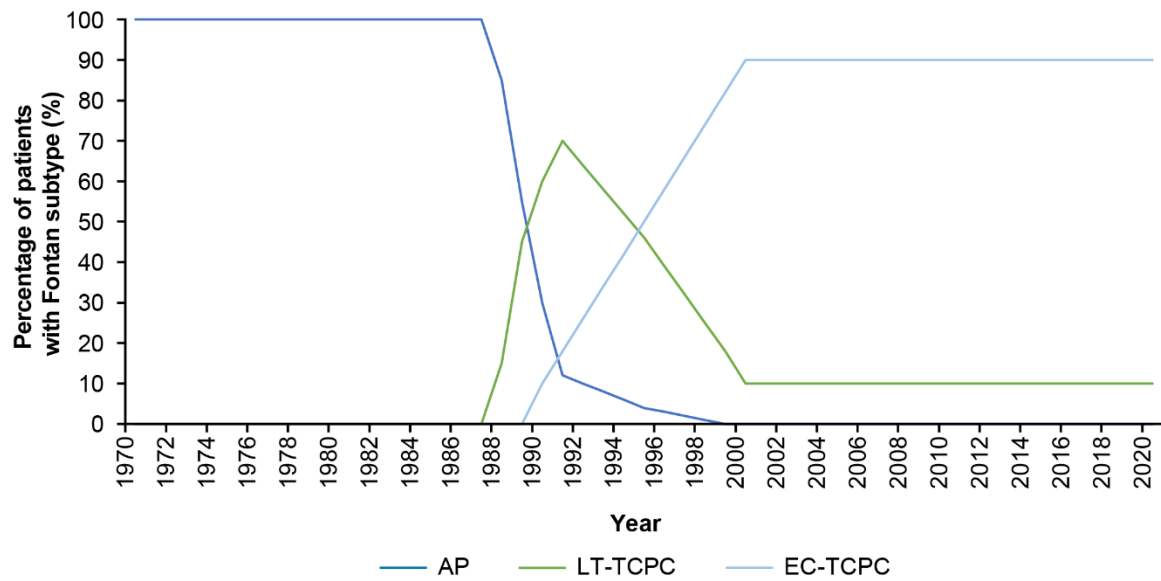

AP, atriopulmonary connection; EC TCPC, extracardiac total cavopulmonary connection; LT TCPC, lateral tunnel total cavopulmonary connection.

**Figure S4: Estimated survival rate (share of patients alive) in the years following completion of Fontan procedure, stratified by Fontan subtype; used as an input for generating the epidemiology model**

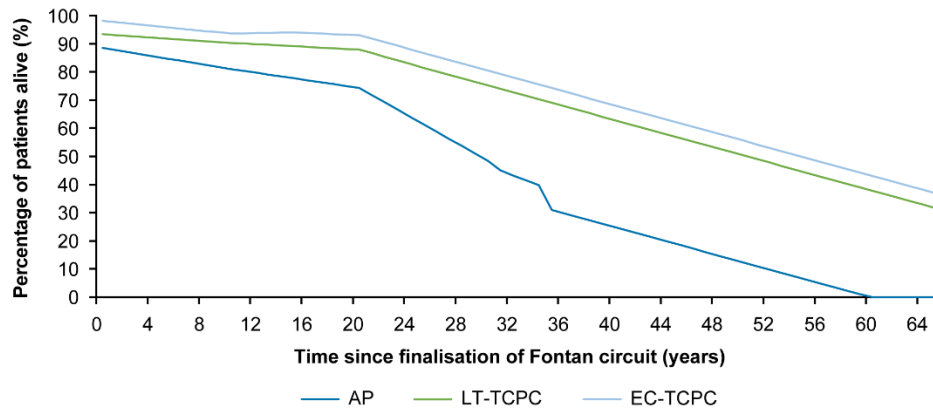

| Fontan surgical procedure | Survival rate, %                  |      |      |      |      |      |      |
|---------------------------|-----------------------------------|------|------|------|------|------|------|
|                           | Time from Fontan procedure, years |      |      |      |      |      |      |
|                           | 0                                 | 10   | 15   | 20   | 25   | 30   | 35   |
| <b>AP</b>                 | 88.5*                             | 81.0 | 77.7 | 74.3 | 61.4 | 48.5 | 31.0 |
| <b>LT-TCPC</b>            | 93.4*                             | 90.3 | 89.1 | 87.9 | 81.5 | N/A  | N/A  |
| <b>EC-TCPC</b>            | 98.0*                             | 93.6 | 94.0 | 93.0 | 86.2 | N/A  | N/A  |

\*Calculated from 30-day mortality after the last Fontan surgery

AP, atriopulmonary connection; EC TCPC, extracardiac total cavopulmonary connection; LT TCPC, lateral tunnel total cavopulmonary connection; N/A, not available.

**Figure S5: Distribution of age among persons previously palliated with a Fontan procedure between 2010–2020**

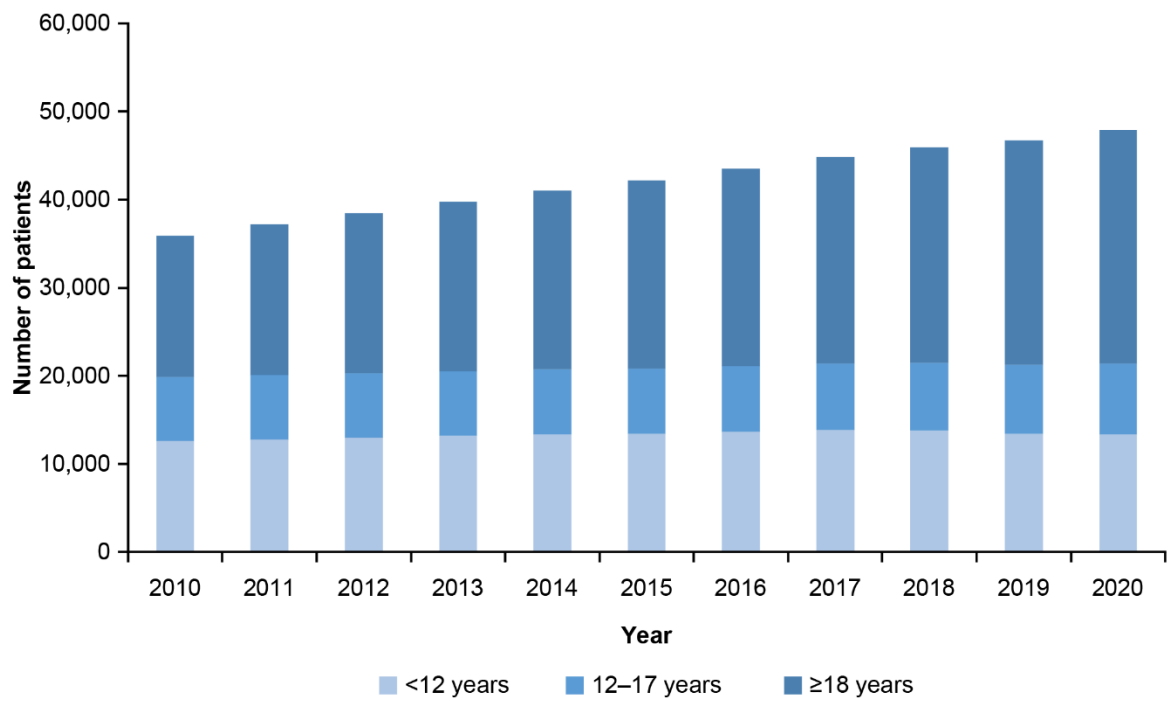

**Table S1: Sources used for extraction of procedure codes and census data**

| Country                          | Database of extraction of procedure code                                      | Database for validation and cross-checking procedure counts                                            | Years of data available (years used in model) | Procedure codes                                                                                                                                                                         |
|----------------------------------|-------------------------------------------------------------------------------|--------------------------------------------------------------------------------------------------------|-----------------------------------------------|-----------------------------------------------------------------------------------------------------------------------------------------------------------------------------------------|
| <b>Australia and New Zealand</b> | The Australia and New Zealand Fontan Registry (Kverneland <i>et al.</i> 2018) | N/A                                                                                                    | 2010–2018 (2014–2018)                         | N/A                                                                                                                                                                                     |
| <b>France</b>                    | CCAM procedure statistics                                                     | N/A                                                                                                    | 2015–2019 (2015–2019)                         | CCAM procedure coding (DFCA004: DZQJ002; DZQJ007; DZSA900; EQCF002; GELE001; YYYY062; YYYY189; YYYY595)                                                                                 |
| <b>Germany</b>                   | 2014–2018 OPS code analysis<br>2014 and 2019 German heart surgery report-10%* | German Heart surgery report                                                                            | 2014–2019 (2015–2019)                         | >80% of codes were extracardiac conduit/tunnel; assumption made that any remaining AP procedures are coded as Sonstige                                                                  |
| <b>Italy</b>                     | No sources available                                                          | -                                                                                                      | -                                             | -                                                                                                                                                                                       |
| <b>The Netherlands</b>           | EACTS Congenital Database Zorgproducten statistics                            | Dx code 2535: partielle/ totale cavo/ pulmonal connection by specialist type cardio/ thoracic surgeons | 2014–2018 (2014–2018)                         | Multiple as specialist societies can create their own procedure and diagnosis codes                                                                                                     |
| <b>Spain</b>                     | CMBD dataset                                                                  | N/A                                                                                                    | 2011–2015 (2011–2015)                         | <b>Up to 2015</b> (translation of US ICD-9-CM) [35.94]<br><b>2016</b><br>Change to ICD-10-PCS [02160JQ]<br><b>2018</b><br>Change to ICD-10-PCS, (re-coding) [06100JQ]                   |
| <b>Sweden</b>                    | NOMESCO (NCSP-S) statistics                                                   | N/A                                                                                                    | 2015–2019 (2015–2019)                         | NOMESCO (NCSP-S) coding allows clarification of intra/extra-cardiac approach and fenestration/shunt<br>±100% extracardiac TCPC [FAE40; FAE00; FAE10; FAE20; FAE30; FAE40; FAE50; FAE96] |

|                    |                       |                                                    |                          |                                                                                                                                                     |
|--------------------|-----------------------|----------------------------------------------------|--------------------------|-----------------------------------------------------------------------------------------------------------------------------------------------------|
| <b>Switzerland</b> | CHOP Statistik        | N/A                                                | 2014–2018<br>(2014–2018) | CHOP procedure coding based on old ICD-9-CM (same as Spain pre-2015)<br>1 clear code labelled as Fontan (35.94)                                     |
| <b>UK</b>          | OPCS England<br>NCHDA | National congenital heart disease<br>audit (NCHDA) | 2016–2019<br>(2016–2019) | Multiple codes (K17.1–8); clear OPCS<br>procedure coding; >85% extracardiac                                                                         |
| <b>US</b>          | Compile claims data   | Akintoye 2019                                      | 2010–2019<br>(2014–2018) | Repair single ventricle;<br>Repair modified Fontan;<br>Bypass right atrium to right pulmonary<br>artery with synthetic substitute, open<br>approach |

\*For Germany's procedural codes, the average annual difference between GHSR and OPS code numbers was calculated.



**Table S2: The number of Fontan procedures per year, obtained using Fontan procedural codes extracted from the relevant national databases**

| Country       | Source                                             | 2010  | 2011  | 2012  | 2013  | 2014  | 2015 | 2016  | 2017  | 2018 | 2019 | Average number of procedures | Number of procedures (per 100,000 people per year) | Population size (2020 midyear estimate) |
|---------------|----------------------------------------------------|-------|-------|-------|-------|-------|------|-------|-------|------|------|------------------------------|----------------------------------------------------|-----------------------------------------|
| <b>AUS/NZ</b> | Australia and New Zealand Fontan registry          | 50    | 64    | 66    | 60    | 82    | 59   | 59    | 45    | 45   | 58   | 59                           | 0.1935                                             | 30,391,000                              |
| <b>CH</b>     | CHOP Statistik                                     |       |       |       |       | 24    | 18   | 18    | 13    | 17   | 18   | 18                           | 0.2142                                             | 8,404,000                               |
| <b>DE</b>     | Heart surgery report                               |       |       |       |       | 215   | 254  | 186   | 240   | 200  | 219  | 219                          | 0.2732                                             | 80,160,000                              |
| <b>ES</b>     | CMBD dataset                                       |       | 55    | 56    | 73    | 50    | 34   | 54    | 53    | 53   | 49   | 53                           | 0.1060                                             | 50,016,000                              |
| <b>FR</b>     | CCAM procedure statistics                          |       |       |       |       |       | 97   | 85    | 78    | 81   | 90   | 86                           | 0.1270                                             | 67,848,000                              |
| <b>IT</b>     | -                                                  |       |       |       |       |       |      |       |       |      |      | N/A                          | 0.1060                                             | 62,403,000                              |
| <b>NL</b>     | EACTS Congenital Database Zorgproducten statistics |       |       |       |       | 29    | 36   | 26    | 26    | 20   | 27   | 27                           | 0.1582                                             | 17,280,000                              |
| <b>SE</b>     | NOMESCO (NCSP-S) statistics                        |       |       |       |       |       | 17   | 24    | 24    | 25   | 16   | 21                           | 0.2078                                             | 10,202,000                              |
| <b>UK</b>     | OPCS/ NCHDA                                        |       |       |       |       |       |      | 179   | 157   | 171  | 174  | 170                          | 0.2589                                             | 65,761,000                              |
| <b>US</b>     | Compile claims data, Akintoye 2019                 | 1,062 | 1,062 | 1,062 | 1,062 | 1,062 | 898  | 1,198 | 1,138 | 988  | 705  | 1,024                        | 0.3078                                             | 332,639,000                             |

AUS/NZ, Australia–New Zealand; DE, Germany; ES, Spain; FR, France; IT, Italy; NL, The Netherlands; SE, Sweden; UK, United Kingdom; US, United States.

Shading is indicative of unavailable values and subsequent estimation of data using averages of the real-world available data; to estimate the number of procedures in Italy, the data for Spain were applied.

**Table S3: The numbers of patients alive in 2020 (A) and 2030 (B) stratified by age group and procedure type**

**A) 2020**

|                       | US            | Europe        | Australia/New Zealand | Total         |
|-----------------------|---------------|---------------|-----------------------|---------------|
| <b>Age group</b>      |               |               |                       |               |
| <12 years             | 7,815         | 4,598         | 449                   | <b>13,374</b> |
| 12–17 years           | 4,726         | 2,721         | 259                   | <b>7,996</b>  |
| ≥18 years             | 14,860        | 9,867         | 755                   | <b>26,511</b> |
| <b>Procedure type</b> |               |               |                       |               |
| AP                    | 2,270         | 1,657         | 113                   | <b>4,209</b>  |
| LT-TCPC               | 4,740         | 3,085         | 248                   | <b>8,398</b>  |
| EC-TCPC               | 20,390        | 12,443        | 1,102                 | <b>35,274</b> |
| <b>Total</b>          | <b>27,401</b> | <b>17,186</b> | <b>1,463</b>          | <b>47,881</b> |

**B) 2030**

|                       | US            | Europe        | Australia/New Zealand | Total         |
|-----------------------|---------------|---------------|-----------------------|---------------|
| <b>Age group</b>      |               |               |                       |               |
| <12 years             | 8,324         | 4,660         | 493                   | <b>14,009</b> |
| 12–17 years           | 4,471         | 2,774         | 258                   | <b>7,805</b>  |
| ≥18 years             | 21,865        | 13,492        | 1,164                 | <b>37,963</b> |
| <b>Procedure type</b> |               |               |                       |               |
| AP                    | 1,157         | 842           | 58                    | <b>2,143</b>  |
| LT-TCPC               | 4,610         | 2,954         | 244                   | <b>8,122</b>  |
| EC-TCPC               | 28,892        | 17,130        | 1,613                 | <b>49,512</b> |
| <b>Total</b>          | <b>34,660</b> | <b>20,926</b> | <b>1,916</b>          | <b>59,777</b> |

AP, atriopulmonary connection; EC-TCPC, extracardiac total cavopulmonary connection; LT-TCPC, lateral tunnel total cavopulmonary connection; N/A, not available.
